# Supplementary material for: Remarkable thermoelectric efficiency of cubic antiperovskites Rb3X(Se & Te)I with strong anharmonicity
Source: Royal Society of Chemistry journal article supplement (doi:10.1039/d3ta04338j), 2023-01-01
Supplement: d3ta04338j1.pdf [file d3ta04338j1.pdf]

# Remarkable Thermoelectric Efficiency of Cubic Antiperovskites $\text{Rb}_3\text{X}(\text{Se} \ \& \ \text{Te})\text{I}$ with Strong Anharmonicity

Shuming Zeng,<sup>1,\*</sup> Qian Shen,<sup>1</sup> Lina Guo,<sup>1</sup> Yinchang  
Zhao,<sup>2,†</sup> Hao Huang,<sup>3</sup> Geng Li,<sup>4,5,‡</sup> and Yusong Tu<sup>1,§</sup>

<sup>1</sup>*College of Physics Science and Technology,  
Yangzhou University, Jiangsu 225009, China*

<sup>2</sup>*Department of Physics, Yantai University,  
Yantai 264005, People's Republic of China*

<sup>3</sup>*Advanced Copper Industry College,  
Jiangxi University of Science and Technology, Yingtan 335000, China*

<sup>4</sup>*School of Materials Science and Engineering,  
National Institute for Advanced Materials, Nankai University,  
Tongyan Road 38, Tianjin 300350, China.*

<sup>5</sup>*National Supercomputer Center in Tianjin, Tianjin 300457, China.*

(Dated: October 10, 2023)

---

\* zengsm@yzu.edu.cn

† y.zhao@ytu.edu.cn

‡ ligeng@nsc-tj.cn

§ ystu@yzu.edu.cn

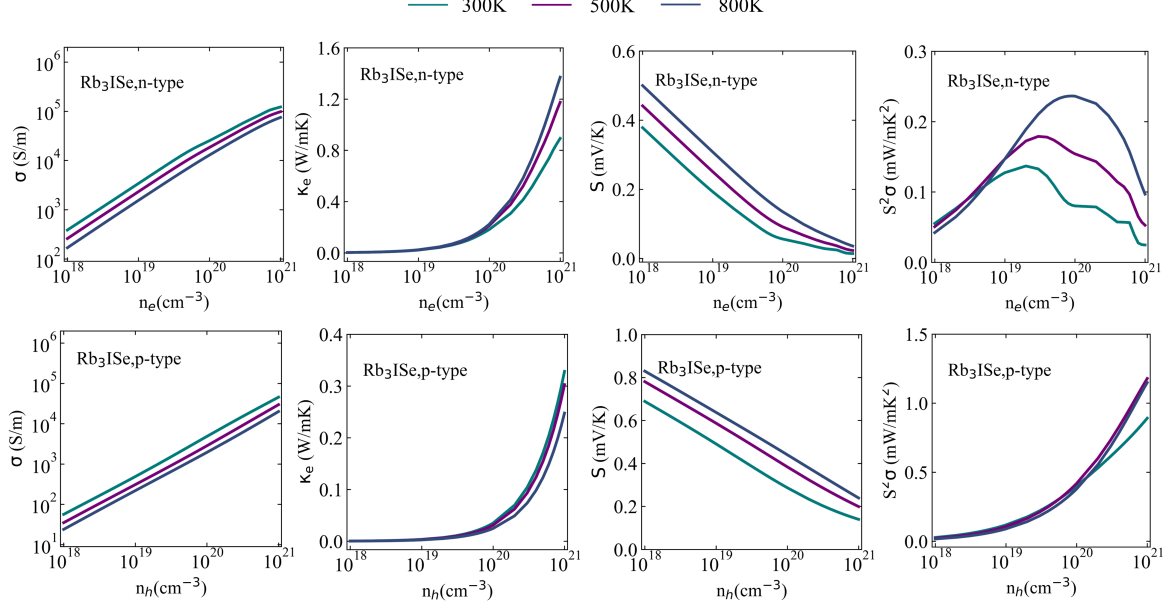

FIG. S1. The calculated electron conductivities  $\sigma$ , electronic thermal conductivity  $\kappa_e$ , Seebeck coefficient  $S$ , and power factor ( $PF$ ), for n-type and p-type doping levels ranging from  $1.0 \times 10^{18}$  to  $1.0 \times 10^{21} \text{ cm}^{-3}$ , at 300 K, 500 K and 800 K for  $\text{Rb}_3\text{ISe}$ .

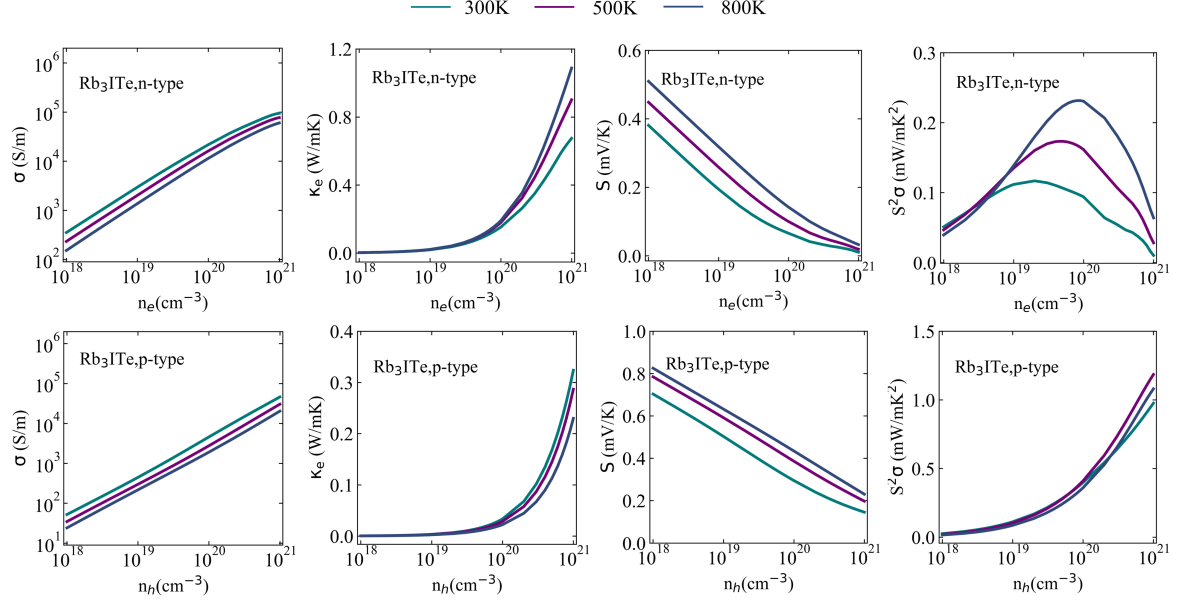

FIG. S2. The calculated electron conductivities  $\sigma$ , electronic thermal conductivity  $\kappa_e$ , Seebeck coefficient  $S$ , and power factor ( $PF$ ), for n-type and p-type doping levels ranging from  $1.0 \times 10^{18}$  to  $1.0 \times 10^{21}$  cm<sup>-3</sup>, at 300 K, 500 K and 800 K for Rb<sub>3</sub>ITe.

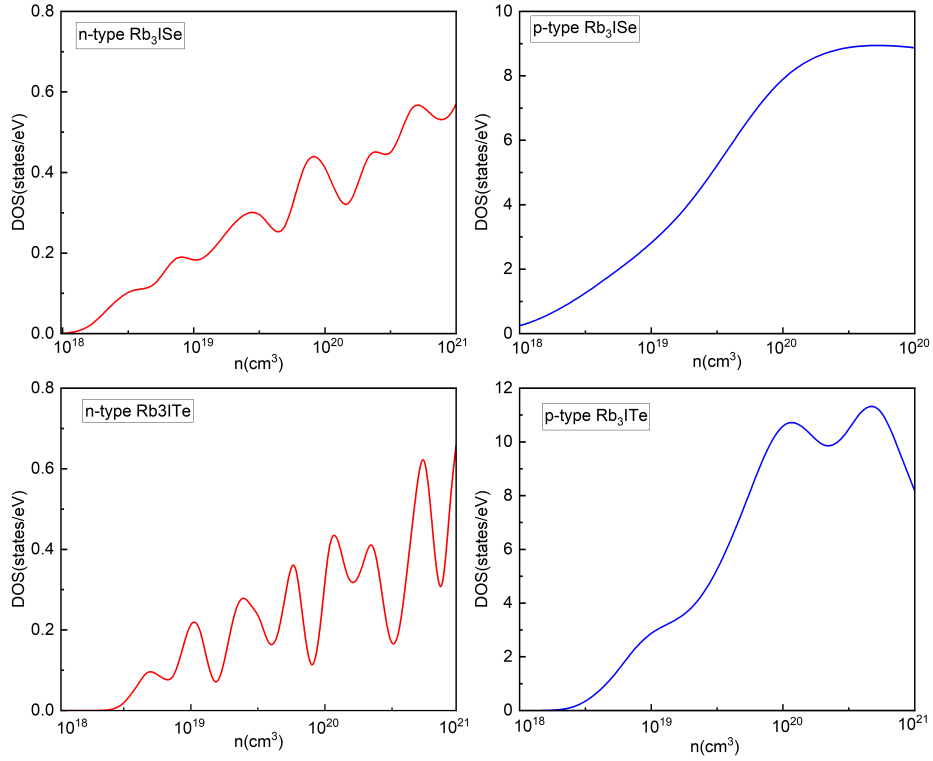

FIG. S3. The DOS values for various doping concentrations at 300 K.
